# Supplementary material for: Sublethal Effects of The Toxic Alga Karlodinium Veneficum On Fish
Source: Research Square preprint supplement (doi:10.21203/rs.3.rs-1003076/v1), 2021-11-10
Supplement: Supplementary file 1 [file 602e9d3c871fb400b7abe8c9.docx]

**Supplementary material**


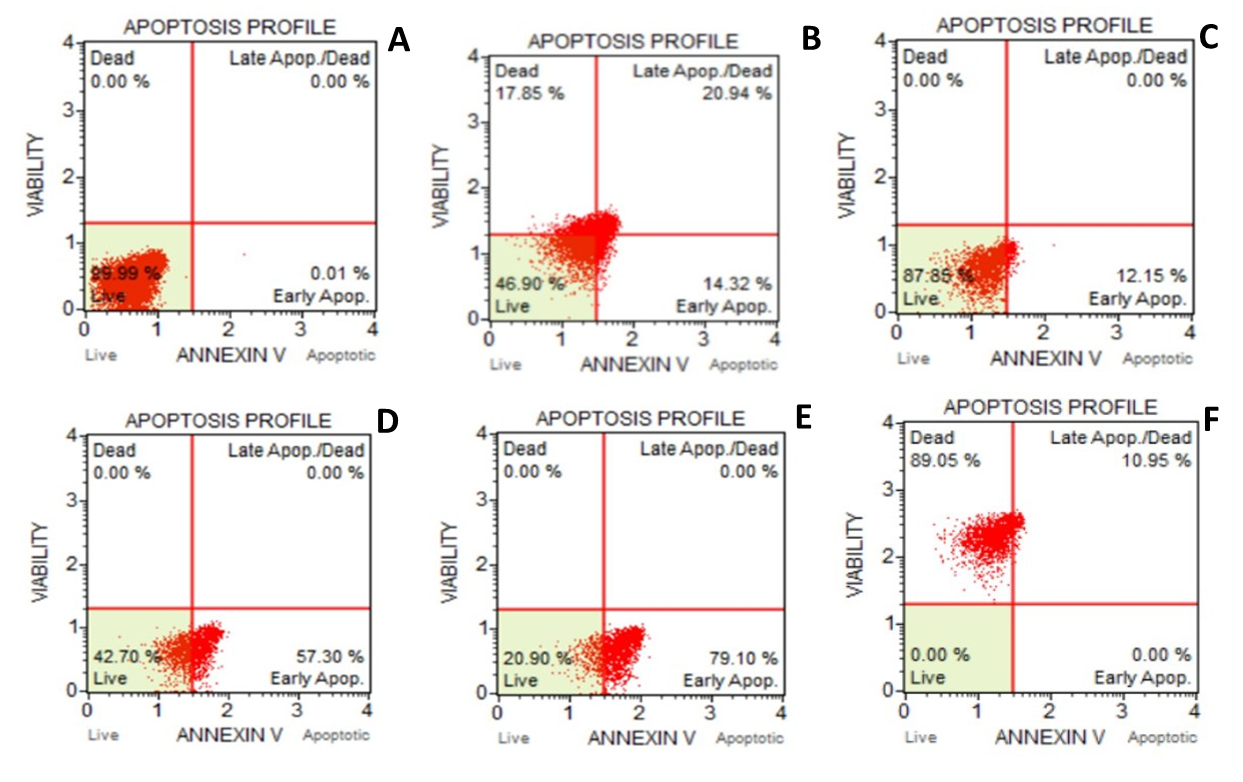


**Figure S1.** Analysis of apoptosis in a flow cytometer, of 8 dpf zebrafish (*Danio rerio*) larvae cells. **A**.Negative control (E3 medium), **B**. Positive Control (2% EtOH), **C**. 0.03 mg L-1 **D**. 0.3125 mg L-1, **E**. 3.125 mg L-1 **F**. 6.25 mg/L of 100% MeOH extract from *K. veneficum* supernatant. The amount expressed in μg L-1 corresponds to the concentration of the total KmTxs analysed by HPLC-MS and expressed asKmTx-2 equivalent.
